# Supplementary material for: An efficient rare-earth free deep red emitting phosphor for improving the color rendering of white light-emitting diodes
Source: Royal Society of Chemistry journal article supplement (doi:10.1039/c6tc05499d), 2017-01-01
Supplement: c6tc05499d1.pdf [file c6tc05499d1.pdf]

## Electronic Supplementary Information (ESI)

### Experiment section

#### The phosphor synthesis process

Take MGO:0.2%Mn<sup>4+</sup> (1 mmol) as example, the typical synthesis process is described as follow: according to the stoichiometric ratio, after weighing 0.5643 g MgO, 0.5221 g GeO<sub>2</sub>, and 0.0011 g MnCO<sub>3</sub>. All of them were mixed in an agate mortar and grinded homogeneously for 20 min, with adding ethanol for a better dispersibility. Then, the mixture was dried in the baking box with the temperature of 80 °C. The dried precursors were ground before shifting to the crucible and transferred to the tube furnace, and sintered at 1300 °C for 8 h in air. Finally, the samples were ground again after cooling down to room temperature for further characterization.

#### The WLEDs fabrication process

White-LEDs were fabricated by combining the light of the commercial YAG yellow phosphor, Mg<sub>15</sub>Ge<sub>5</sub>(1-0.2%)O<sub>24</sub>: 0.2%Mn<sup>4+</sup> red phosphor and blue-emitting InGaN chip. First step was mixing the epoxy resin A 0.1 g and B 0.1 g with the ratio of 1:1, then the proper amount of YAG and MGO:0.2%Mn<sup>4+</sup> phosphors were added and mixed thoroughly. Typically, the specific amount of the commercial YAG and red phosphor is 7 % the sum of epoxy resin A and B. Then slightly adjustment could be take based on the EL spectra. The obtained mixture was smoothly coated on the surface of InGaN chips with the thickness around 1.5 mm, and the fabricated LED was putted into the baking box and dried at 140 °C. All the measurements were conducted at a forward current of 20 mA, and the excitation wavelength of the LEDs is 422 nm.

Table S1. Related parameters of WLEDs with two typical compositions.

| Crystallographic Data of Mg <sub>14</sub> Ge <sub>4.99</sub> O <sub>14</sub> :0.2%Mn <sup>4+</sup> |                                                                                |           |           |          |           |
|----------------------------------------------------------------------------------------------------|--------------------------------------------------------------------------------|-----------|-----------|----------|-----------|
| Formula                                                                                            | Mg <sub>14</sub> Ge <sub>5(1-0.2%)</sub> O <sub>14</sub> :0.2%Mn <sup>4+</sup> |           |           |          |           |
| Crystal space, Space group                                                                         | Orthorhombic, Pbam(55)                                                         |           |           |          |           |
| Lattice parameters/ Å, deg                                                                         | a = 14.5245    α = 90<br>b = 10.2287    β = 90<br>c = 5.9503    γ = 90         |           |           |          |           |
| Cell volume/ Å <sup>3</sup> ,<br>Formula units per cell Z                                          | 884.0184<br>2                                                                  |           |           |          |           |
| Rwp/%                                                                                              | 5.94                                                                           |           |           |          |           |
| Rp/%                                                                                               | 3.98                                                                           |           |           |          |           |
| Fractional coordinates                                                                             | Name                                                                           | x         | y         | z        | Occupancy |
|                                                                                                    | Ge1                                                                            | 0.000000  | 0.000000  | 0.000000 | 1.0000    |
|                                                                                                    | Ge2                                                                            | 0.127948  | 0.502700  | 0.000000 | 1.0000    |
|                                                                                                    | Ge3                                                                            | 0.187485  | 0.325999  | 0.500000 | 1.0000    |
|                                                                                                    | Mg1                                                                            | 0.000000  | 0.500000  | 0.500000 | 1.0200    |
|                                                                                                    | Mg2                                                                            | 0.000000  | 0.000000  | 0.500000 | 0.9900    |
|                                                                                                    | Mg3                                                                            | 0.177324  | 0.177763  | 0.000000 | 0.9900    |
|                                                                                                    | Mg4                                                                            | 0.329292  | 0.151939  | 0.500000 | 0.9800    |
|                                                                                                    | Mg5                                                                            | -0.008567 | 0.249042  | 0.249232 | 0.9900    |
|                                                                                                    | Mg6                                                                            | 0.329487  | 0.419889  | 0.254110 | 0.9900    |
|                                                                                                    | O1                                                                             | 0.084261  | 0.332094  | 0.000000 | 1.0000    |
|                                                                                                    | O2                                                                             | 0.419754  | 0.339220  | 0.000000 | 1.0000    |
|                                                                                                    | O3                                                                             | 0.247273  | -0.008713 | 0.000000 | 1.0000    |
|                                                                                                    | O4                                                                             | 0.072680  | 0.316267  | 0.500000 | 1.0000    |
|                                                                                                    | O5                                                                             | 0.424039  | 0.334802  | 0.500000 | 1.0000    |
|                                                                                                    | O6                                                                             | 0.246986  | -0.020698 | 0.500000 | 1.0000    |
|                                                                                                    | O7                                                                             | 0.080888  | 0.075673  | 0.210237 | 1.0000    |
|                                                                                                    | O8                                                                             | 0.409873  | 0.086188  | 0.241808 | 1.0000    |
|                                                                                                    | O9                                                                             | 0.240783  | 0.244099  | 0.278928 | 1.0000    |

**Table S2.** Specific CRIs R1–R14 for WLEDs with chip+YAG and chip+YAG+MGO, respectively.

| <b>Composition</b>  | <b>R1</b> | <b>R2</b> | <b>R3</b> | <b>R4</b> | <b>R5</b> | <b>R6</b> | <b>R7</b> |
|---------------------|-----------|-----------|-----------|-----------|-----------|-----------|-----------|
| <b>Chip+YAG</b>     | 51.3      | 59.9      | 72.7      | 59.1      | 53.4      | 52.1      | 68.9      |
| <b>Chip+YAG+MGO</b> | 85.9      | 80.2      | 71.9      | 87.9      | 82.1      | 69.2      | 81.2      |

  

| <b>Composition</b>  | <b>R8</b> | <b>R9</b> | <b>R10</b> | <b>R11</b> | <b>R12</b> | <b>R13</b> | <b>R14</b> |
|---------------------|-----------|-----------|------------|------------|------------|------------|------------|
| <b>Chip+YAG</b>     | 39.8      | -77.5     | 9.6        | 57.6       | -3.9       | 50.3       | 83.6       |
| <b>Chip+YAG+MGO</b> | 86.0      | 92.2      | 53.0       | 91.4       | 21.6       | 83.1       | 83.3       |
